# Supplementary material
Source: ML conference proceedings conference paper supplement (https://openreview.net/forum?id=FFA8ftmnjF)
Supplement: supplementary_material [file backtrack.pdf › supplementary-material-neurips/learned-planners/new_plots/backtrack.pdf]

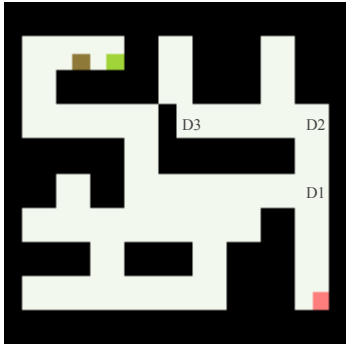

(a) Observation

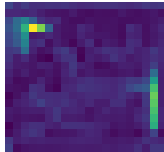

(b) All box channels  
step 1 tick 0

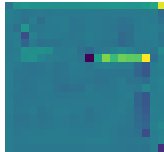

(c) L2H9 (right)  
step 5 tick 1

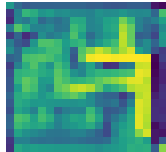

(d) L2I9 (right)  
step 5 tick 1

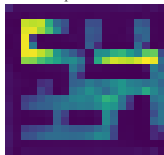

(e) L2O9 (right)  
step 5 tick 1

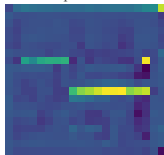

(f) L2H9 (right)  
step 9 tick 1

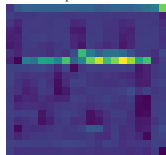

(g) L2H9 (right)  
Abl. step 9 tick 1
