# Supplementary material
Source: ML conference proceedings conference paper supplement (https://openreview.net/forum?id=FFA8ftmnjF)

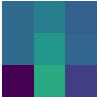

$i$

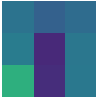

$j$

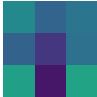

$f$

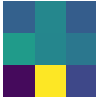

$o$

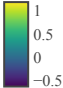

Supplement: supplementary_material [file box_to_agent_down_copy.pdf › supplementary-material-neurips/learned-planners/new_plots/box_to_agent_down_copy.pdf]

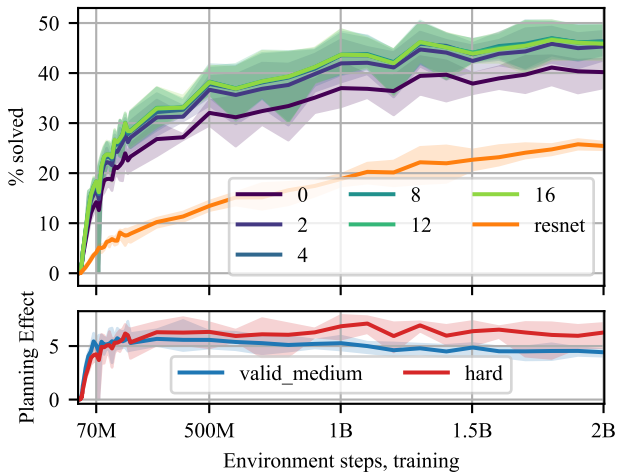

Supplement: supplementary_material [file fig1_hard_with_valid_hard_plan_effect.pdf › supplementary-material-neurips/learned-planners/plot/fig1_hard_with_valid_hard_plan_effect.pdf]

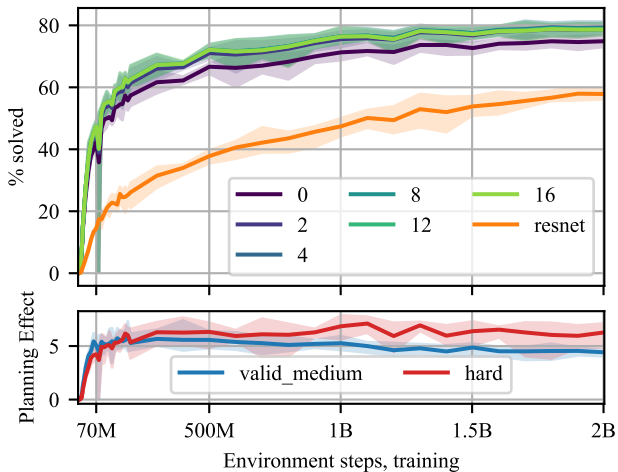

Supplement: supplementary_material [file fig1_valid_medium_with_valid_hard_plan_effect.pdf › supplementary-material-neurips/learned-planners/plot/fig1_valid_medium_with_valid_hard_plan_effect.pdf]

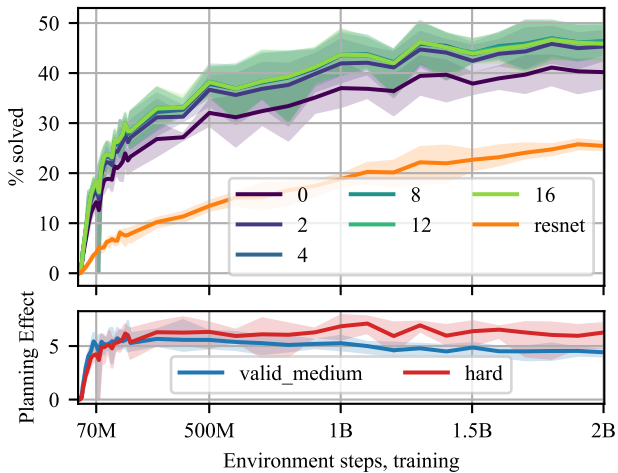

Supplement: supplementary_material [file fig1_with_valid_hard_plan_effect.pdf › supplementary-material-neurips/learned-planners/plot/fig1_with_valid_hard_plan_effect.pdf]

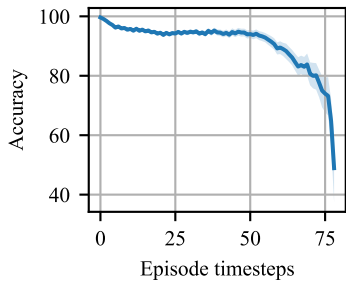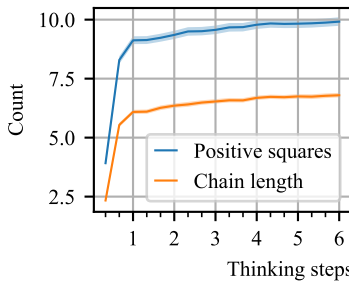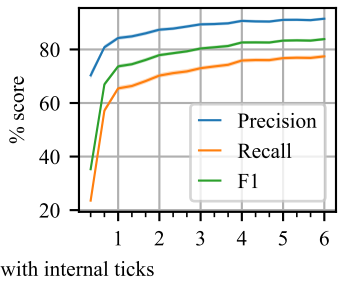

Supplement: supplementary_material [file future_acc_plan_quality_recall.pdf › supplementary-material-neurips/learned-planners/plot/future_acc_plan_quality_recall.pdf]

Test-unfiltered planning at 12

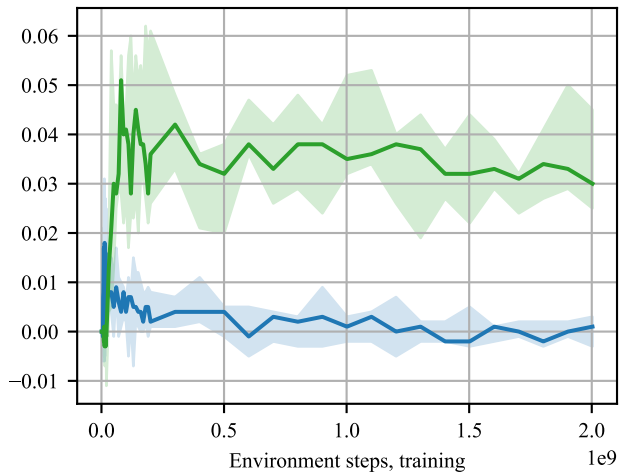

Val-medium planning at 12

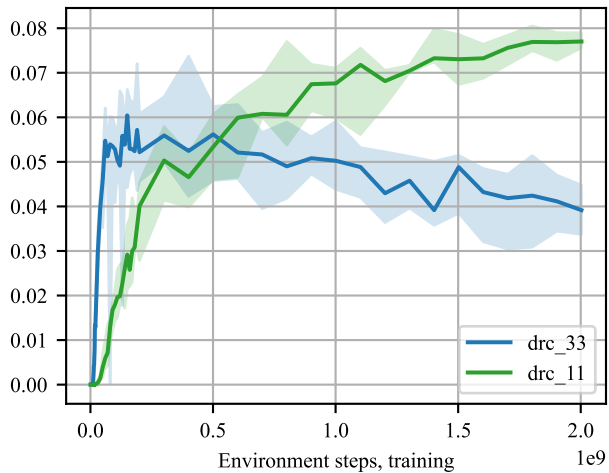

Supplement: supplementary_material [file planning_at_12.pdf › supplementary-material-neurips/learned-planners/plot/plots/planning_at_12.pdf]

Test-unfiltered planning at 12

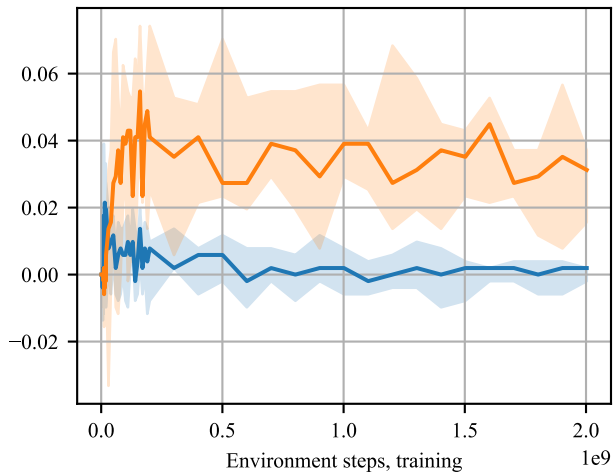

Val-medium planning at 12

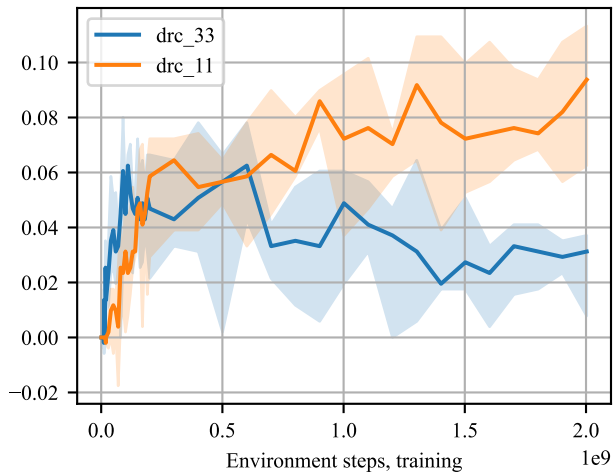

Supplement: supplementary_material [file planning_at_12.pdf › supplementary-material-neurips/learned-planners/plot/plots/plots/planning_at_12.pdf]

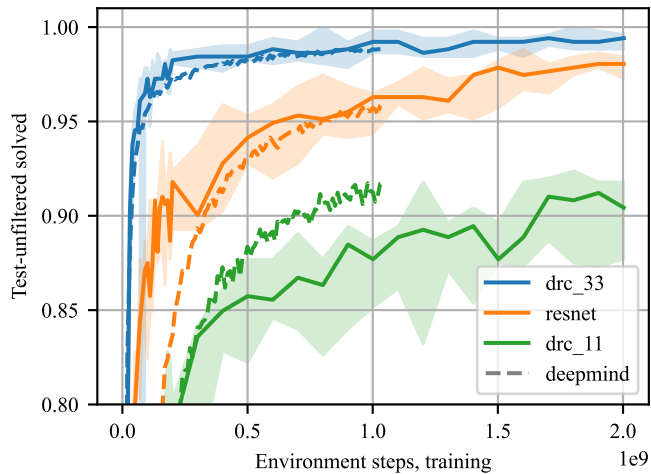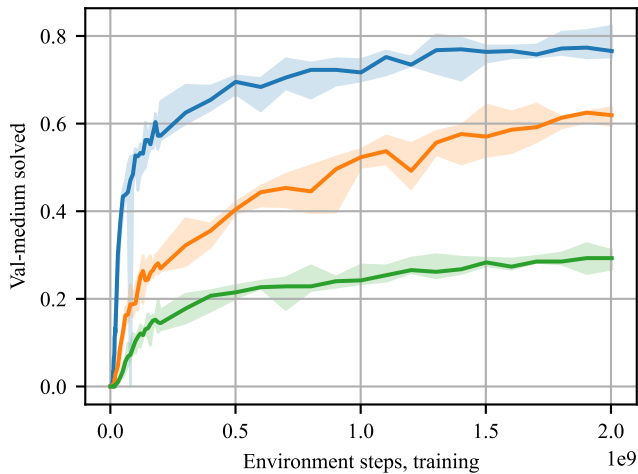

Supplement: supplementary_material [file test_and_valid_learning_curves.pdf › supplementary-material-neurips/learned-planners/plot/plots/plots/test_and_valid_learning_curves.pdf]

Val-medium solved

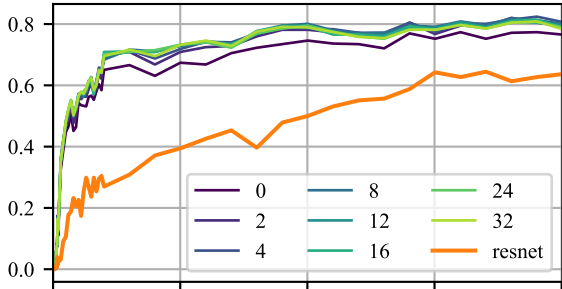

Plan. Effect

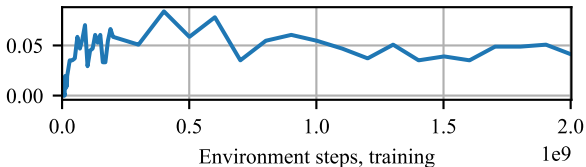

Supplement: supplementary_material [file valid_curve.pdf › supplementary-material-neurips/learned-planners/plot/plots/plots/valid_curve.pdf]

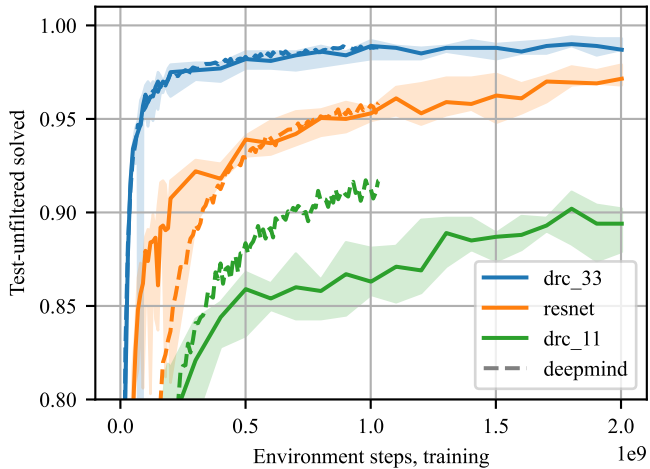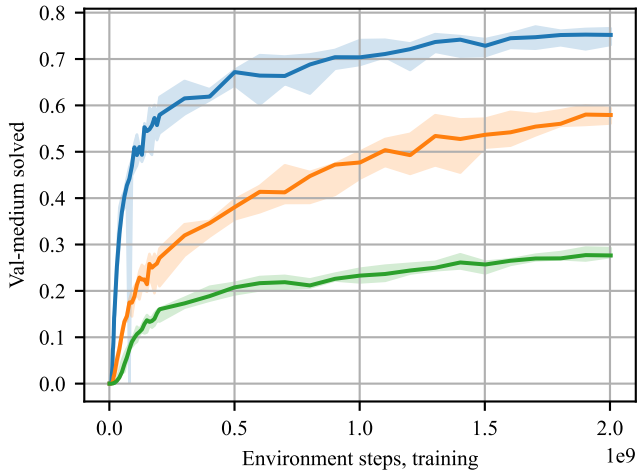

Supplement: supplementary_material [file test_and_valid_learning_curves.pdf › supplementary-material-neurips/learned-planners/plot/plots/test_and_valid_learning_curves.pdf]

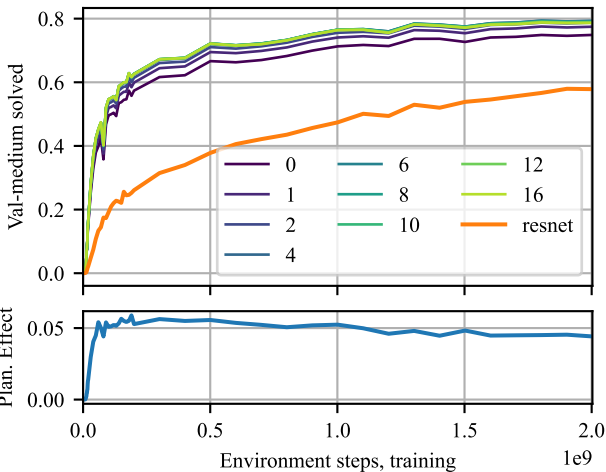

Supplement: supplementary_material [file valid_curve.pdf › supplementary-material-neurips/learned-planners/plot/plots/valid_curve.pdf]

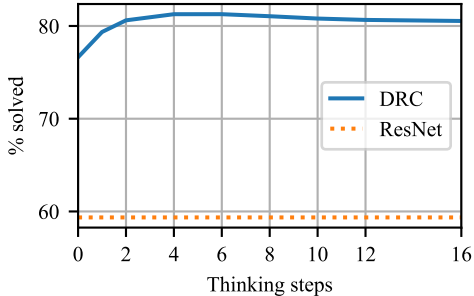

Supplement: supplementary_material [file success_rate_across_thinking_steps.pdf › supplementary-material-neurips/learned-planners/plot/success_rate_across_thinking_steps.pdf]

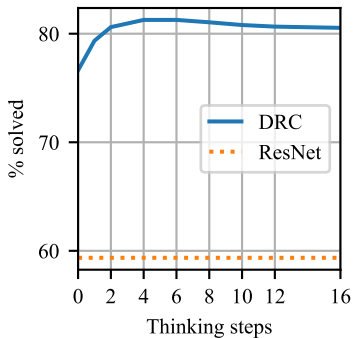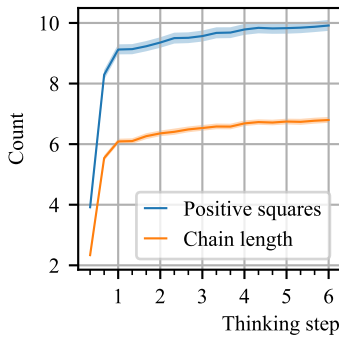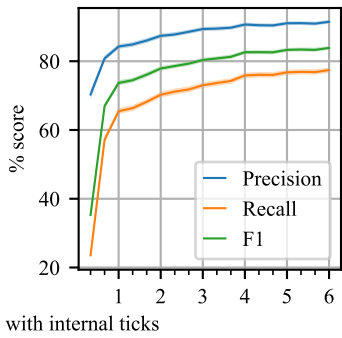

Supplement: supplementary_material [file success_rate_plan_quality_recall.pdf › supplementary-material-neurips/learned-planners/plot/success_rate_plan_quality_recall.pdf]
